# Supplementary material for: Enhanced properties of Pd/CeO2-nanorods modified with alkaline-earth metals for catalytic oxidation of low-concentration methane
Source: Royal Society of Chemistry journal article supplement (doi:10.1039/c8ra07797e), 2018-01-01
Supplement: c8ra07797e1.pdf [file c8ra07797e1.pdf]

### Supplementary Information

Enhanced properties of Pd/CeO<sub>2</sub>-nanorods modified with alkaline-earth metals  
for catalytic oxidation of low-concentration methane

Tianyu Guo<sup>a,b,#</sup>, Xiaorong Nie<sup>c,#</sup>, Jianping Du<sup>b,c\*</sup>, Jinping Li<sup>b,d\*</sup>

<sup>a</sup>College of Environmental Science and Engineering, Taiyuan University of  
Technology, 030024 Shanxi, PR China

<sup>b</sup>Shanxi Key Laboratory of Gas Energy Efficient and Clean Utilization, 030024  
Shanxi, PR China

<sup>c</sup> College of Chemistry and Chemical Engineering, Taiyuan University of Technology,  
030024 Shanxi, PR China

<sup>d</sup> Research Institute of Special Chemicals, Taiyuan University of Technology, 030024  
Shanxi, PR China

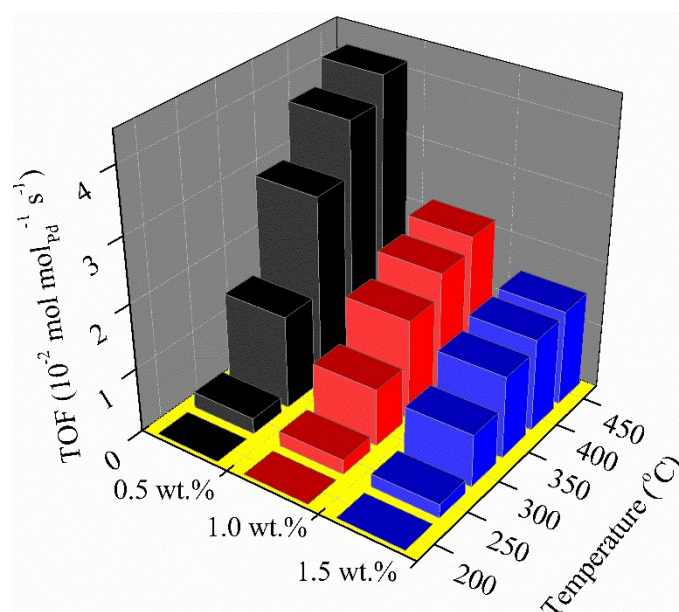

Fig.S1 Activities of the Pd/CeO<sub>2</sub>-ND catalysts with various Pd contents at different temperatures

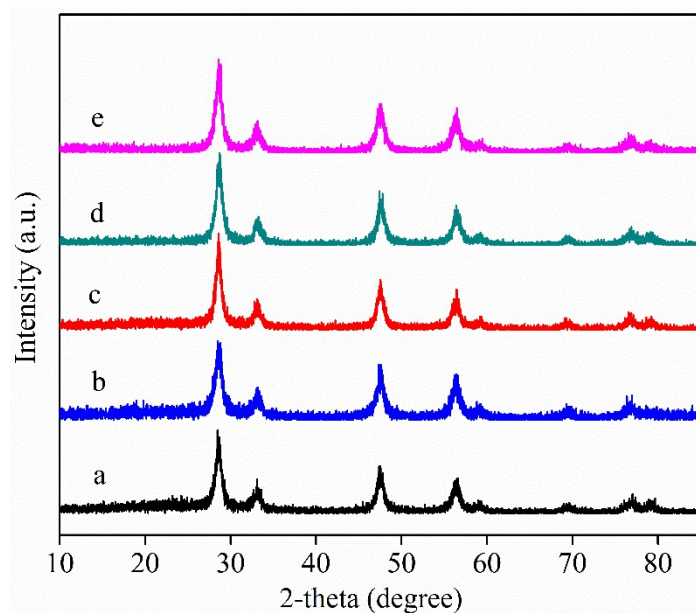

Fig.S2 XRD patterns of the PdM/CeO<sub>2</sub>-ND catalysts: (a) Pd/CeO<sub>2</sub>-ND, (b) PdMg/CeO<sub>2</sub>-ND, (c) PdCa/CeO<sub>2</sub>-ND, (d) PdSr/CeO<sub>2</sub>-ND and (e) PdBa/CeO<sub>2</sub>-ND

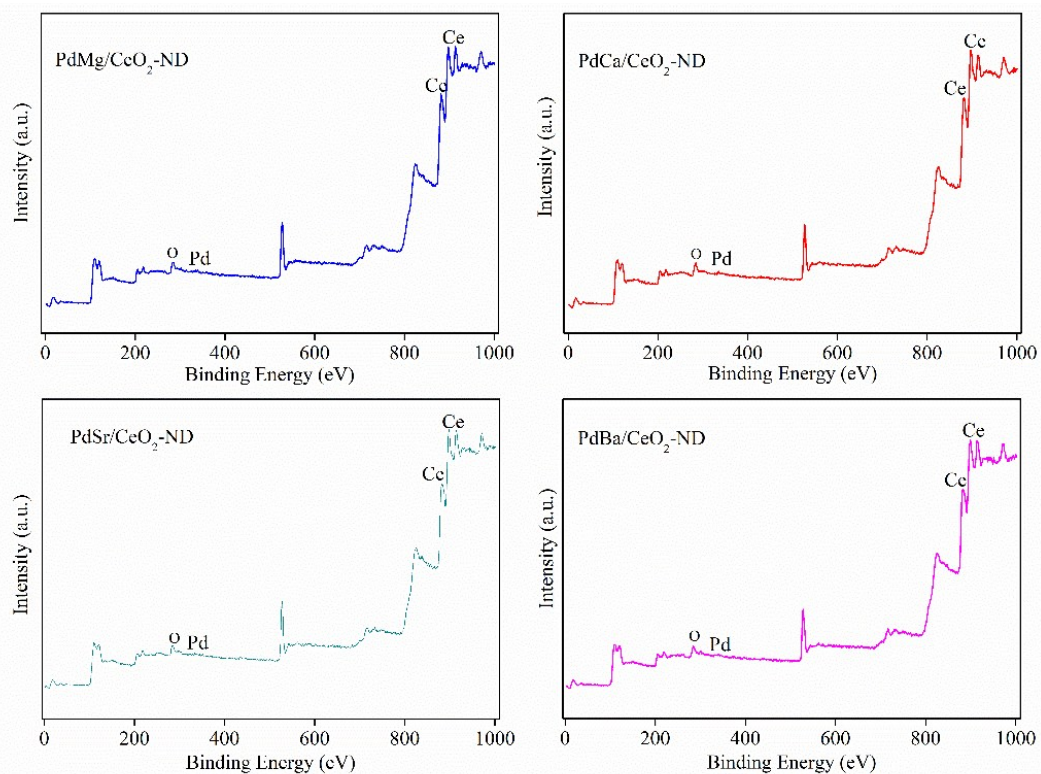

Fig.S3 XPS spectra of the PdM/CeO<sub>2</sub>-ND catalysts

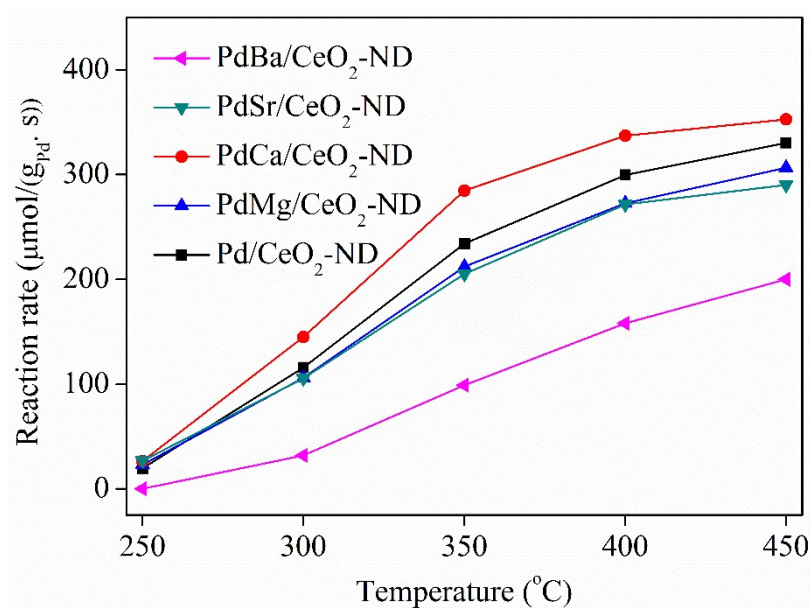

Fig.S4 Methane oxidation rate as a function of temperature over the PdM/CeO<sub>2</sub>-ND catalysts

Table S1 Catalytic activities of the PdM/CeO<sub>2</sub>-ND catalysts for methane oxidation

| Catalyst                  | Methane oxidation  |                    |                    | Methane oxidation at 340 °C          |                                                                                         |
|---------------------------|--------------------|--------------------|--------------------|--------------------------------------|-----------------------------------------------------------------------------------------|
|                           | $T_{10\%}$<br>(°C) | $T_{50\%}$<br>(°C) | $T_{90\%}$<br>(°C) | CH <sub>4</sub><br>conversion<br>(%) | Reaction rate<br>( $\times 10^{-6}$ mol g <sub>Pd</sub> <sup>-1</sup> s <sup>-1</sup> ) |
| Pd/CeO <sub>2</sub> -ND   | 260                | 328                | 444                | 58.52                                | 211.25                                                                                  |
| PdMg/CeO <sub>2</sub> -ND | 260                | 336                | >450               | 52.62                                | 191.38                                                                                  |
| PdCa/CeO <sub>2</sub> -ND | 255                | 313                | 390                | 70.59                                | 257.53                                                                                  |
| PdSr/CeO <sub>2</sub> -ND | 257                | 339                | >450               | 51.05                                | 185.96                                                                                  |
| PdBa/CeO <sub>2</sub> -ND | 303                | 428                | >450               | 23.51                                | 86.59                                                                                   |

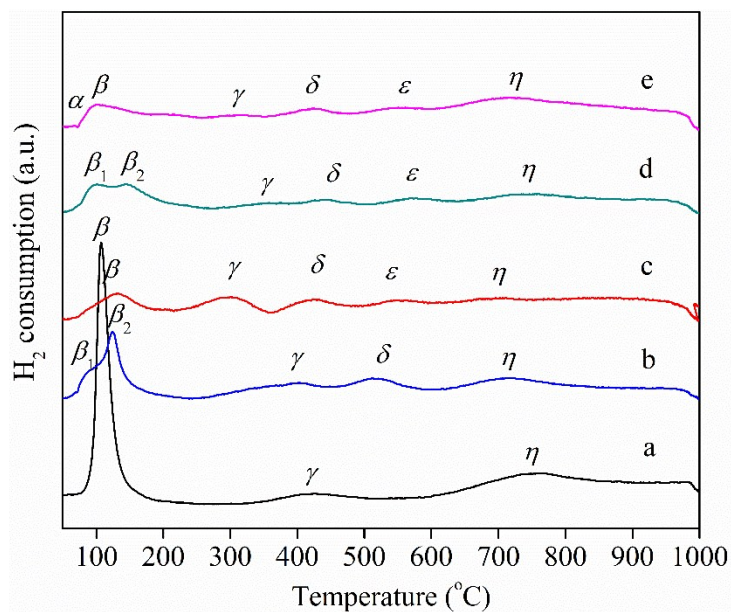

Fig.S5 H<sub>2</sub>-TPR profiles of the PdM/CeO<sub>2</sub>-ND catalysts: (a) Pd/CeO<sub>2</sub>-ND, (b) PdMg/CeO<sub>2</sub>-ND, (c) PdCa/CeO<sub>2</sub>-ND, (d) PdSr/CeO<sub>2</sub>-ND and (e) PdBa/CeO<sub>2</sub>-ND

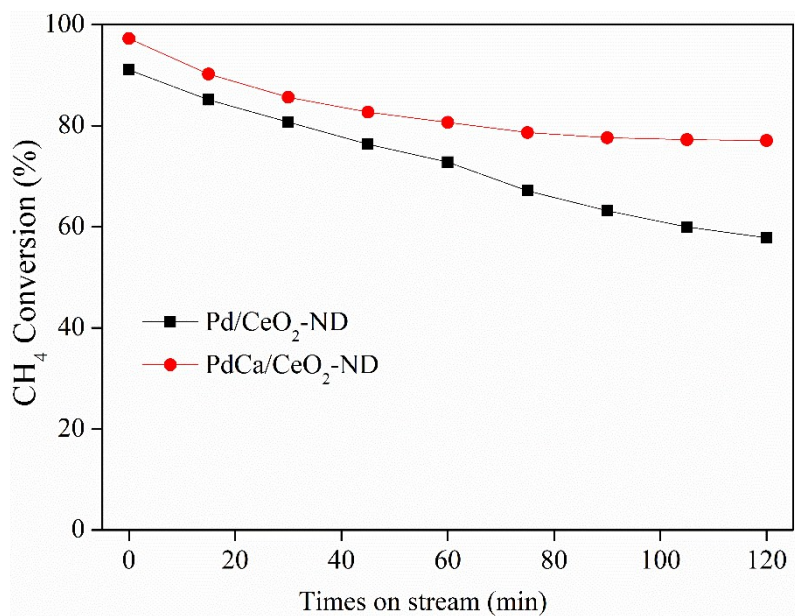

Fig.S6 Long-term stability of PdCa/CeO<sub>2</sub>-ND and Pd/CeO<sub>2</sub>-ND catalysts at 450°C for 120 min.

GHSV: 16,000 mL g<sup>-1</sup>h<sup>-1</sup>.

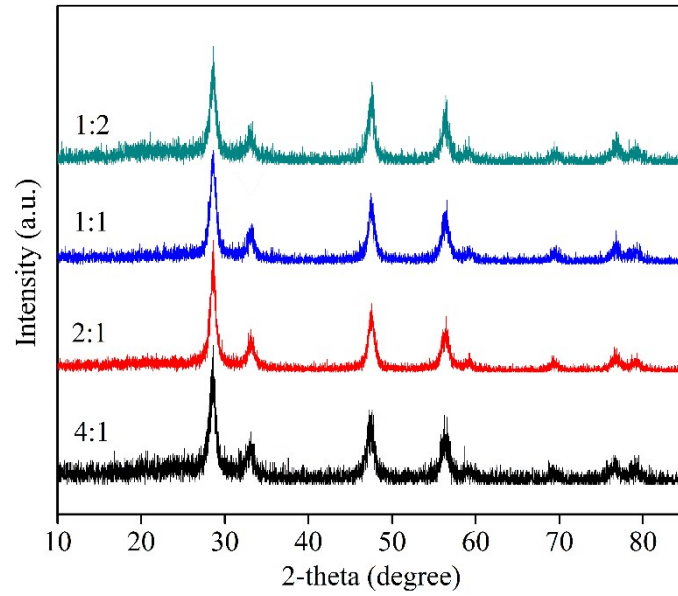

Fig.S7 XRD patterns over the PaCa/CeO<sub>2</sub>-ND catalysts with different molar ratio of Pd/Ca

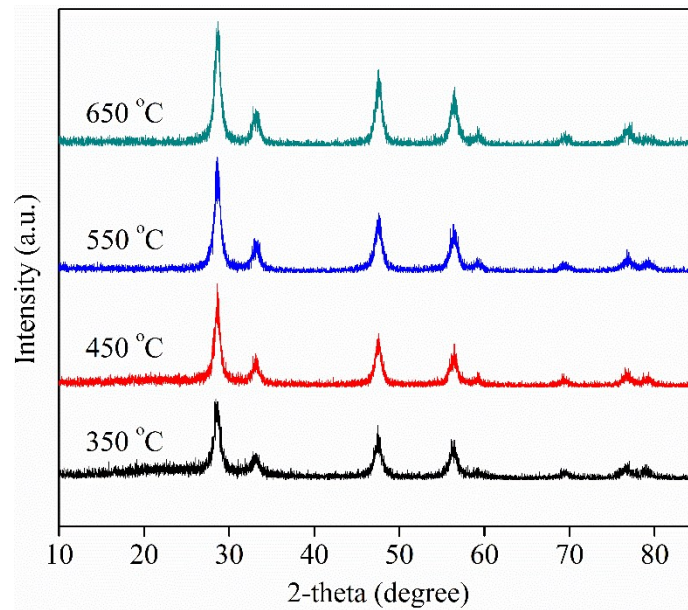

Fig.S8 XRD patterns over the PaCa/CeO<sub>2</sub>-ND catalysts (n(Pd):n(Ca) = 2:1) with different calcination temperatures

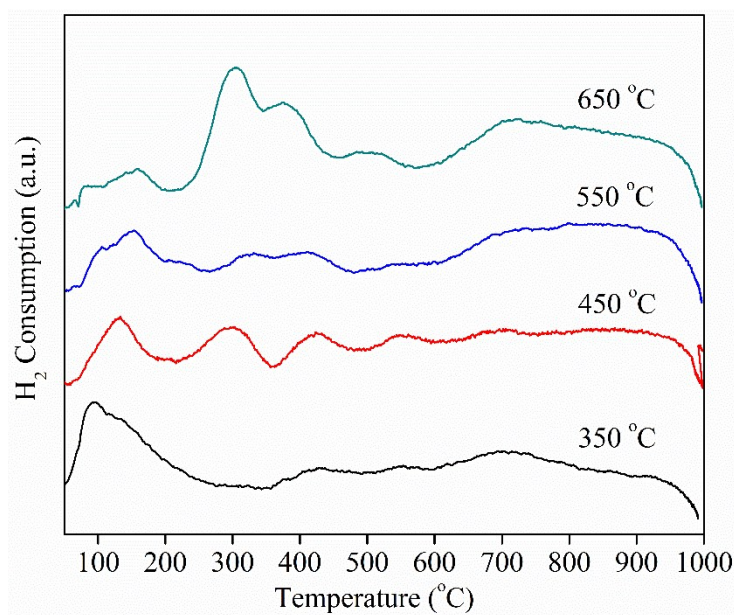

Fig.S9 H<sub>2</sub>-TPR profiles over the PaCa/CeO<sub>2</sub>-ND catalysts (n(Pd):n(Ca) = 2:1) with different calcination temperatures
